# Supplementary material for: Transcriptomic Analysis of Polyhexamethyleneguanidine-Induced Lung Injury in Mice after a Long-Term Recovery
Source: MDPI journal article supplement (doi:10.3390/toxics9100253), 2021-10-08
Supplement: s1 [file s1]

# Supplementary Materials: Transcriptomic Analysis of Polyhexamethyleneguanidine-induced Lung Injury in Mice after a Long-term Recovery

Jeongah Song, Kyung Jin Jung, Jae-Woo Cho, Tamina Park, Su-Cheol Han and Daeui Park

Table S1. The list of primers used.

| Gene name       | Accession number | Forward primer        | Reverse primer         | Product size |
|-----------------|------------------|-----------------------|------------------------|--------------|
| <i>Serpine1</i> | NM_022415        | CTTTGTCATCTCAGCCCGCA  | TGAAGAGGATTGTCTCTGTCCG | 98           |
| <i>Ccl2</i>     | NM_011333        | AGGTGTCCCAAAGAAGCTGTA | ATGTCTGGACCCATTCTTCT   | 85           |
| <i>Mmp12</i>    | NM_001320076     | CACAACAGTGGGAGAGAAAA  | AGCTTGAATACCAGATGGGATG | 130          |
| <i>Ptges</i>    | NM_022415        | TCCTCGGCTTCGTGTA      | ATCCAGGCGATCAGAGGGTT   | 52           |
| <i>Arg1</i>     | NM_007482        | CTTTCTCAAAGGACAGCCTCG | GACCAGCTTTCCTCAGTGCT   | 66           |
| <i>Arg2</i>     | NM_022415        | CTCCACGGGCAAATTCCTTG  | AGAGAAAGGGGCTCCGACTA   | 72           |
| <i>Ctsb</i>     | NM_007798        | GGCTCTTGTGGGCATTGG    | ACTCGGCCATTGGTGTGAAT   | 71           |
| <i>Rab7b</i>    | NM_001311096     | TAGGAAGTACCAGGGCACCG  | GCCTGGAGAGAGCTTGATGG   | 61           |
| <i>Cav1</i>     | NM_001243064     | GACCCCAAGCATCTCAACGA  | AGATGCCGTCGAACTGTGT    | 91           |
| <i>Gucy1a3</i>  | NM_021896        | TTCCCGAAGAGAACCACAGC  | ACAGTCACTTCGGAAGCAGG   | 117          |
| <i>Krt14</i>    | NM_001313956     | CCGACCTGGAGATGCAGATT  | GCCACCTCCTCGTGTTTC     | 73           |

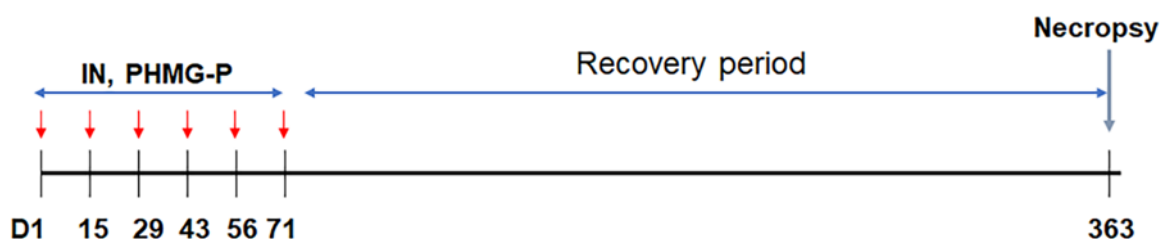

**Figure S1.** Scheme of experimental design. Mice were intranasally instilled with 0.3 mg/kg PHMG-P six times at 2-week intervals. The control group was treated with saline through the same route.

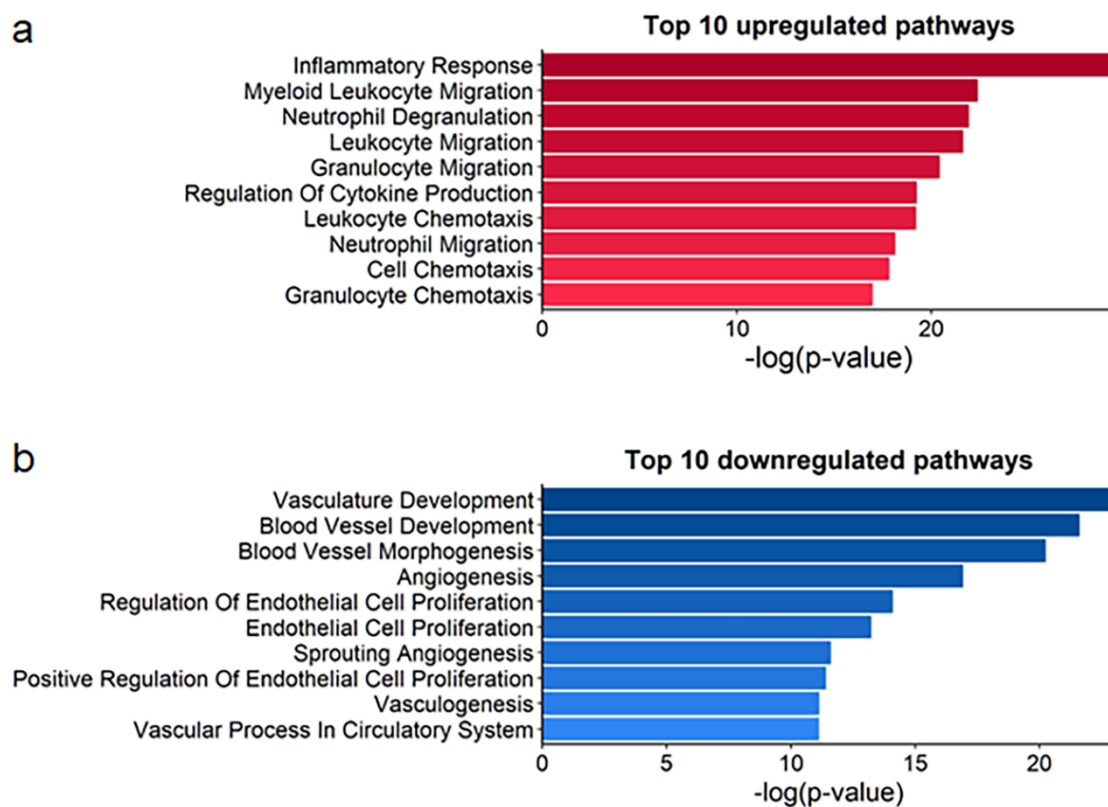

**Figure S2.** Top 10 biological pathways significantly changed by PHMG-P in EnrichR analysis.
